# Supplementary material
Source: publisher site journal article supplement (https://www.dovepress.com/article/326178)
Supplement: Supplementary file 1 [file get_supplementary_file.php]

**A Novel CD73 Inhibitor SHR170008 Suppresses Adenosine in  
Tumor and Enhances Anti-tumor Activity with PD-1 Blockade in a  
Mouse Model of Breast Cancer**

Suxing Liu<sup>1\*</sup>, Di Li<sup>1</sup>, Jian Liu<sup>2</sup>, Huiyun Wang<sup>1</sup>, Ivana Horecny<sup>1</sup>, Ru Shen<sup>1</sup>, Rumin  
Zhang<sup>1</sup>, Heping Wu<sup>2</sup>, Qiyue Hu<sup>3</sup>, Peng Zhao<sup>2</sup>, Fengqi Zhang<sup>2</sup>, Yinfa Yan<sup>2</sup>, Jun  
Feng<sup>4</sup>, Linghang Zhuang<sup>2</sup>, Jing Li<sup>1</sup>, Lianshan Zhang<sup>5</sup>, and Weikang Tao<sup>5</sup>

<sup>1</sup>Department of Biology, Eternity Bioscience Inc. Cranbury, NJ 08512, USA;

<sup>2</sup>Department of Chemistry, Eternity Bioscience Inc. Cranbury, NJ 08512, USA;

<sup>3</sup>Department of Molecular Modeling, Shanghai Hengrui Pharmaceutical Co. Ltd.

Shanghai, Shanghai 200245, China; <sup>4</sup>Department of Process Chemistry,  
Shanghai Hengrui Pharmaceutical Co. Ltd. Shanghai, Shanghai 200245, China;

<sup>5</sup>R&D Center, Shanghai Hengrui Pharmaceutical Co. Ltd., Shanghai, Shanghai  
200245, China

\*Corresponding author: Suxing Liu, Eternity Bioscience Inc. 6 Cedarbrook Drive,  
Cranbury, NJ 08512, USA, E-mail: [lius@eternitybioscience.com](mailto:lius@eternitybioscience.com)

## Supplementary Materials and Methods

**Figure S1** Characterization of SHR170008 by analyses of  $^1\text{H}$  NMR,  $^{13}\text{C}$  NMR, HRMS and HPLC. **Figure S1** Characterization of SHR170008 by analyses of  $^1\text{H}$  NMR,  $^{13}\text{C}$  NMR, HRMS and HPLC. **(A)**  $^1\text{H}$  NMR spectrum of SHR170008 in Methanol- $d_4$  (500 MHz). **(B)**  $^{13}\text{C}$  NMR spectrum of SHR170008 in Methanol- $d_4$  (126 MHz). **(C)** HRMS spectrum of SHR170008 ( $[\text{M}+\text{H}]^+ = 538.1260$ ). **(D)** HPLC spectrum of SHR170008.

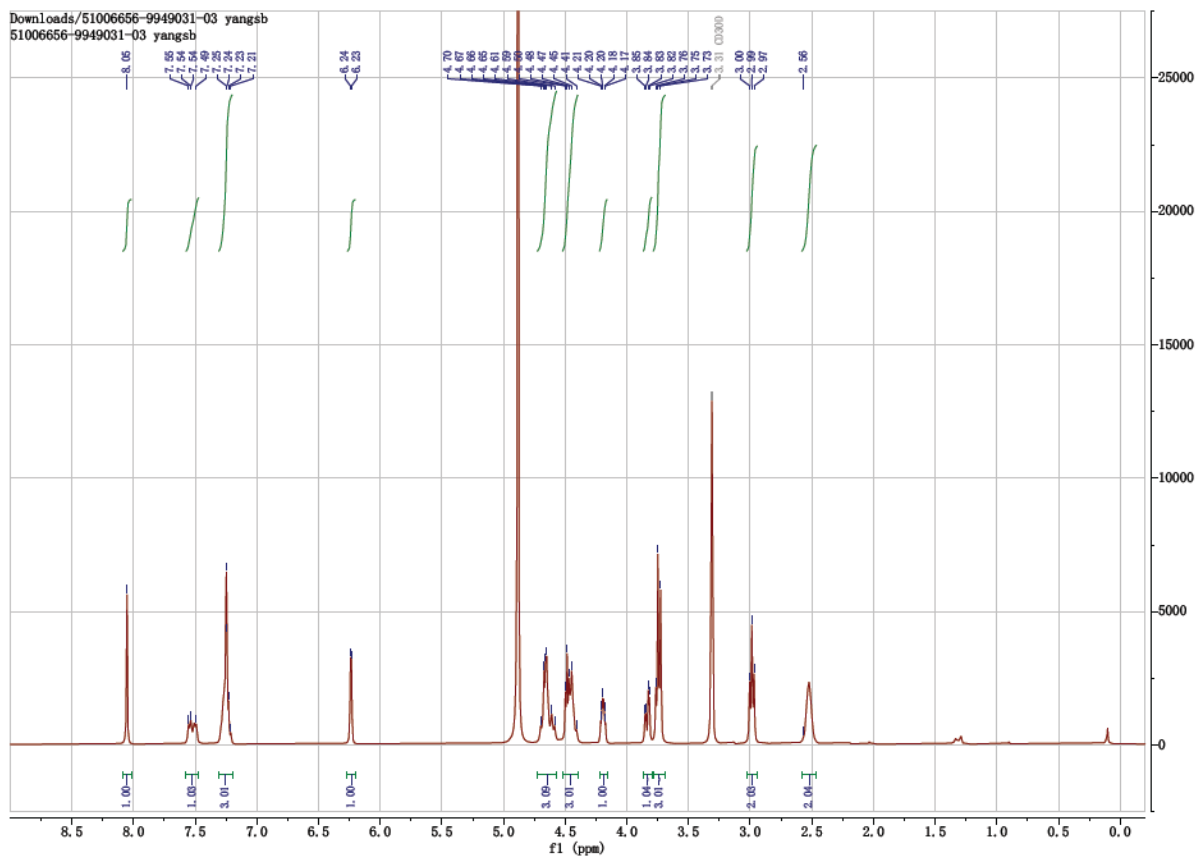

**(A)**  $^1\text{H}$  NMR spectrum of SHR170008 in Methanol- $d_4$  (500 MHz).

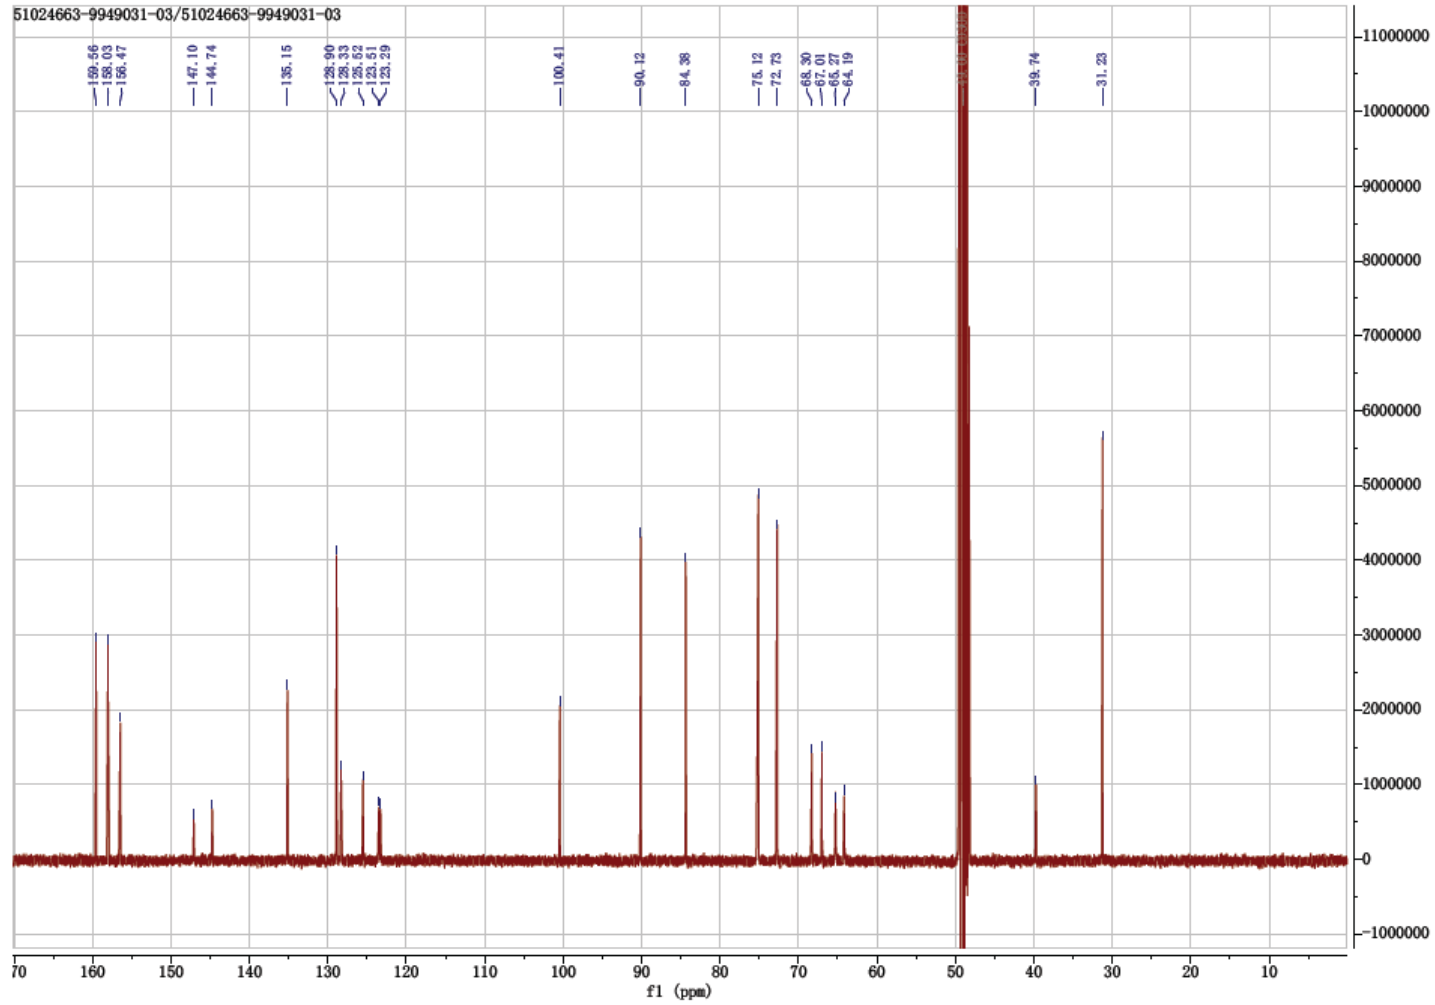

(B)  $^{13}\text{C}$  NMR spectrum of SHR170008 in Methanol- $d_4$  (126 MHz).

SHR170008-010-00 #2632 RT: 8.57 AV: 1 NL: 2.95E8  
T: FTMS + c ESI Full ms [100.0000-1500.0000]

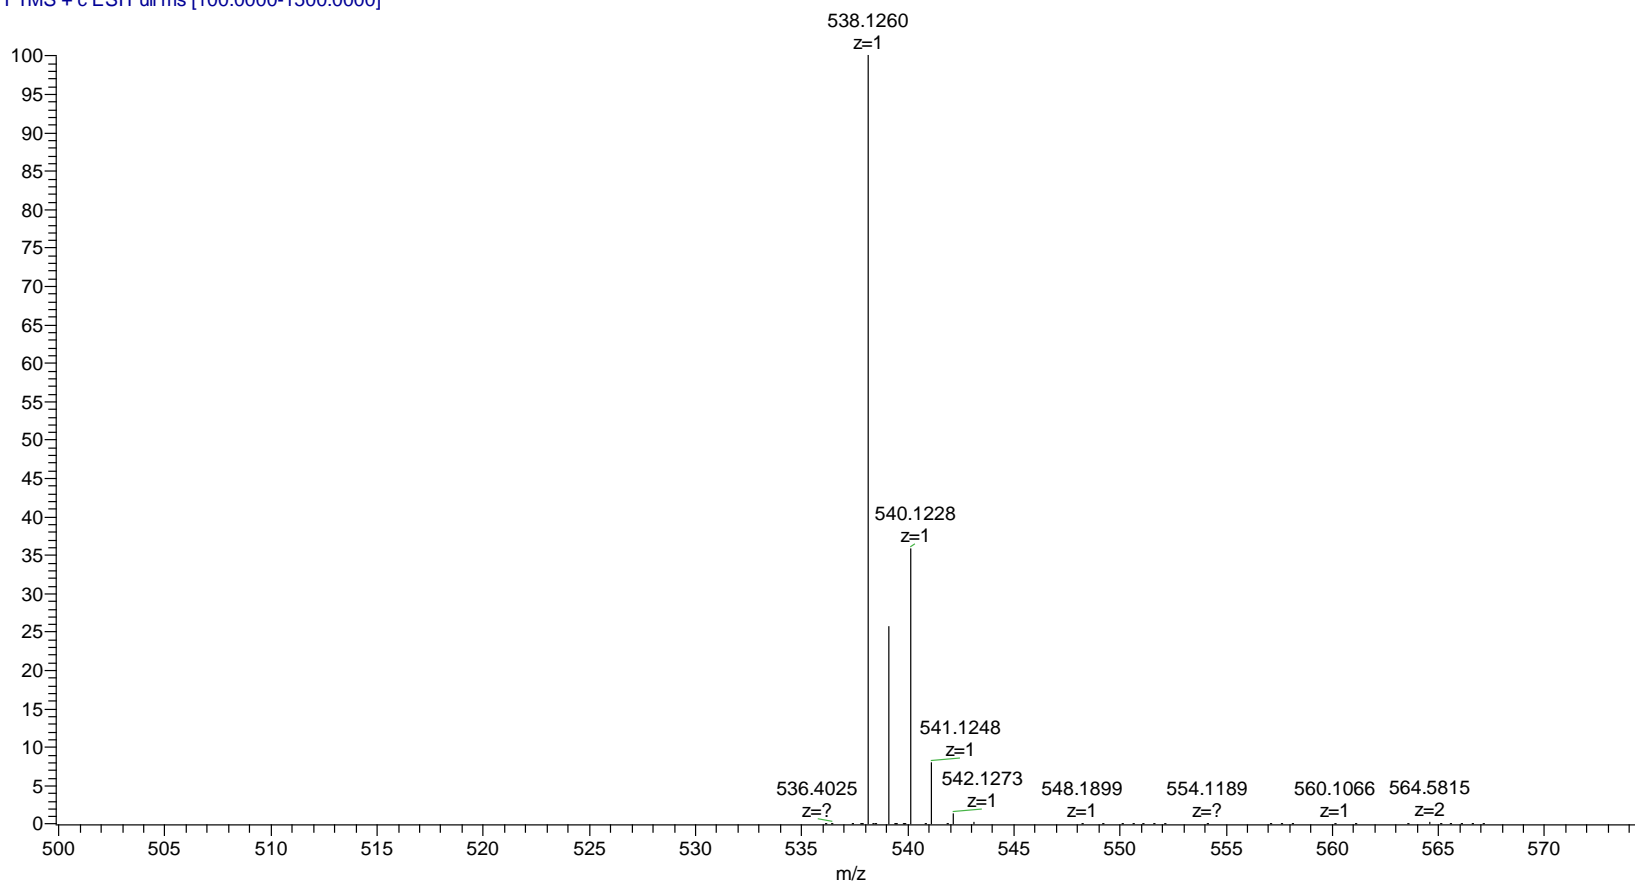

(C) HRMS spectrum of SHR170008 ( $[M+H]^+ = 538.1260$ ).

SAMPLE INFORMATION

|                   |                            |                     |                 |
|-------------------|----------------------------|---------------------|-----------------|
| Sample Name:      | 70011225-9949020-01        | Acquired By:        | System          |
| Sample Type:      | Unknown                    | Sample Set Name:    | 20181031_1      |
| Vial:             | 88                         | Acq. Method Set:    | M_5_95_30MIN_BC |
| Injection #:      | 1                          | Processing Method:  | HPLC            |
| Injection Volume: | 5.00 ul                    | Channel Name:       | W2489 ChB       |
| Run Time:         | 30.0 Minutes               | Proc. Chnl. Descr.: | W2489 ChB 254nm |
| Date Acquired:    | 10/31/2018 11:07:20 AM CST |                     |                 |
| Date Processed:   | 10/31/2018 11:46:44 AM CST |                     |                 |

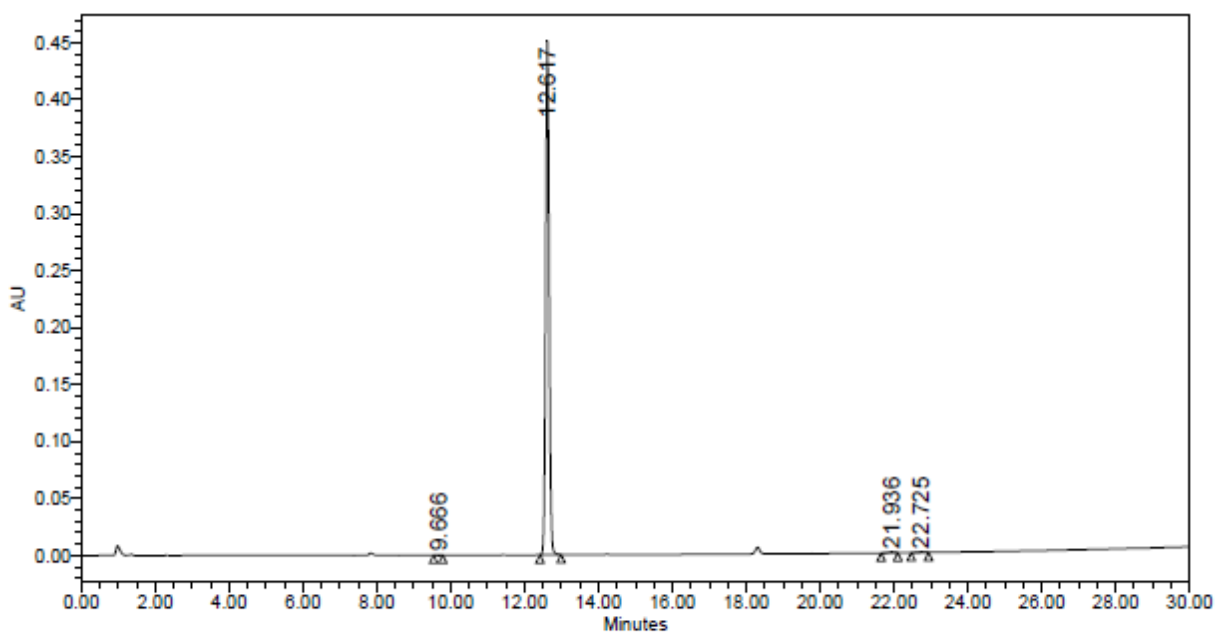

|   | RT     | Area    | % Area | Height | USP Resolution |
|---|--------|---------|--------|--------|----------------|
| 1 | 9.666  | 1792    | 0.06   | 274    |                |
| 2 | 12.617 | 2977273 | 99.55  | 448397 | 16.26          |
| 3 | 21.936 | 6753    | 0.23   | 614    | 37.38          |
| 4 | 22.725 | 4975    | 0.17   | 455    | 2.49           |

(D) HPLC spectrum of SHR170008.

**Figure S2** MS/MS spectrum of SHR170008 in human liver microsomes.

SHR170008\_HLM #3356 RT: 9.17 AV: 1 NL: 6.33E6  
F: FTMS + c ESI d Full ms2 538.13@hcd15.00 [50.00-570.00]

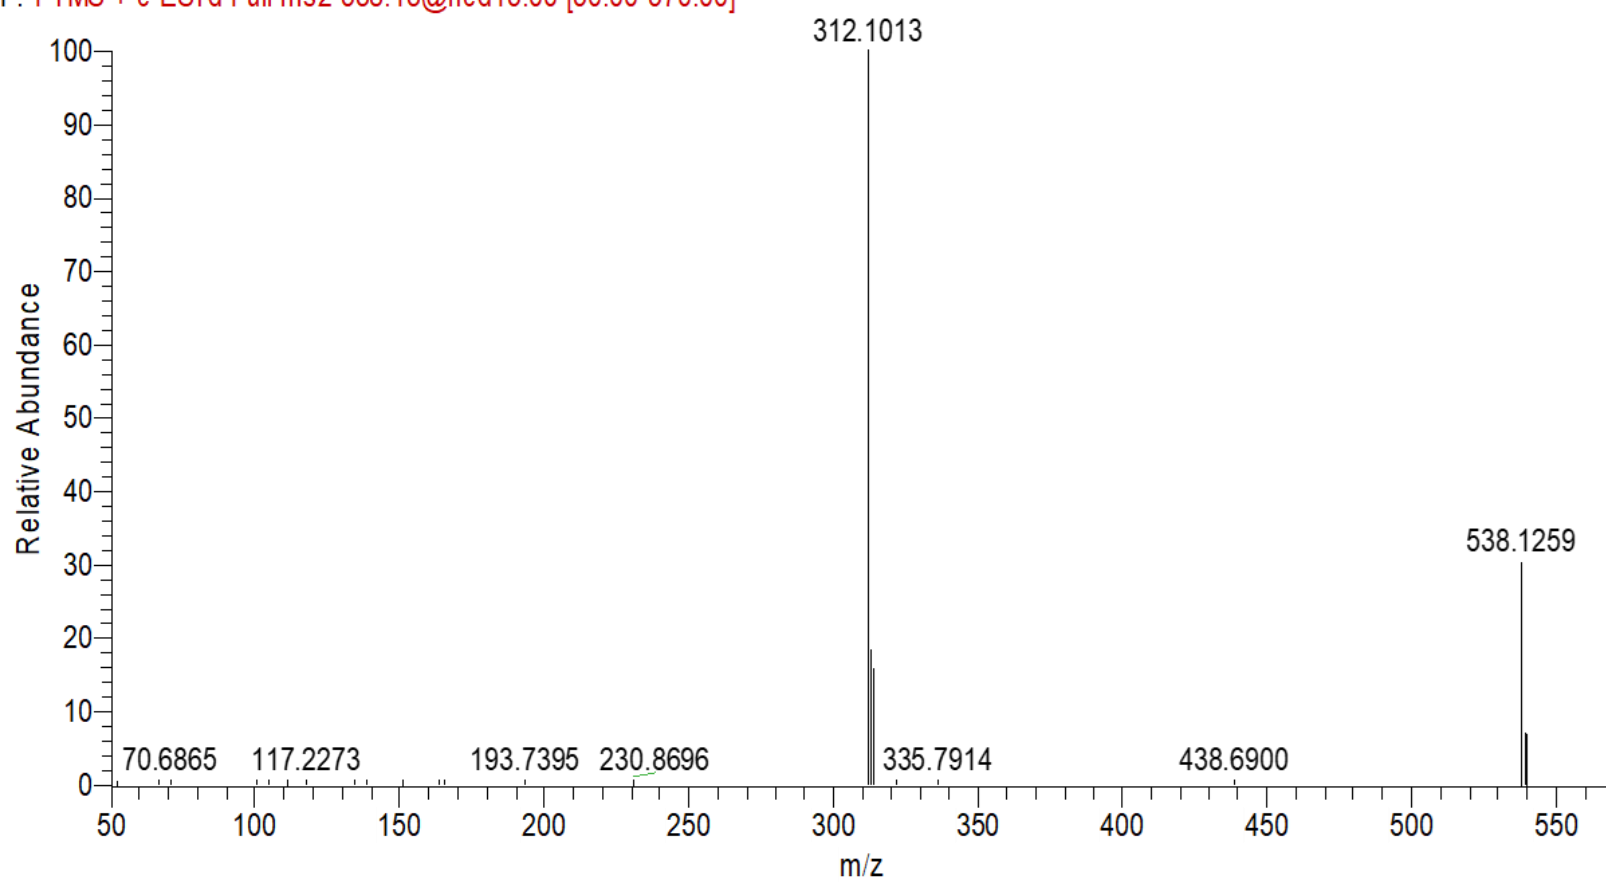

**A**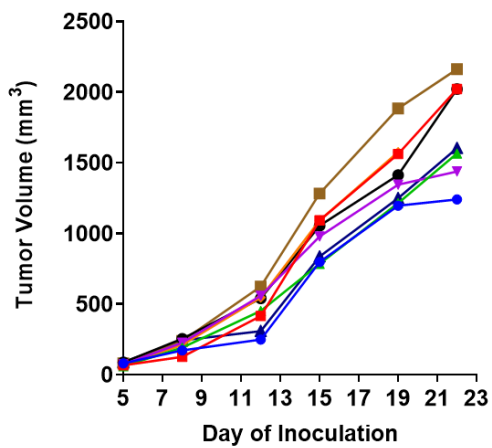**B**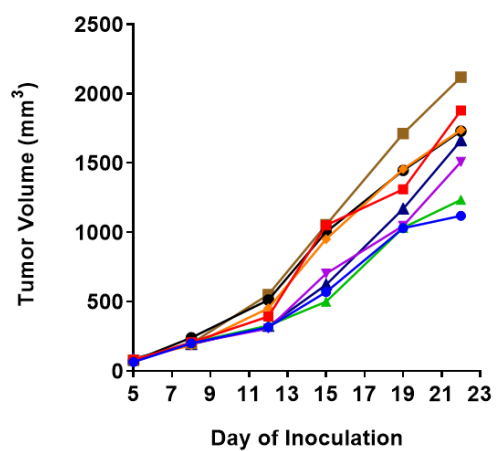**C**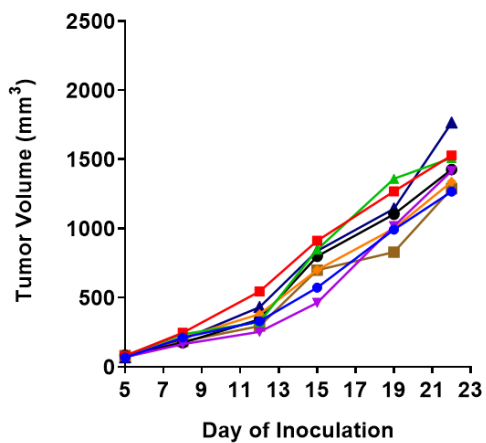

**Figure S3** Tumor growth curves of individual mouse bearing EMT6 mouse breast tumor during treatment with 1 mg/kg (**A**), 3 mg/kg (**B**) and 10 mg/kg of SHR170008 (**C**).



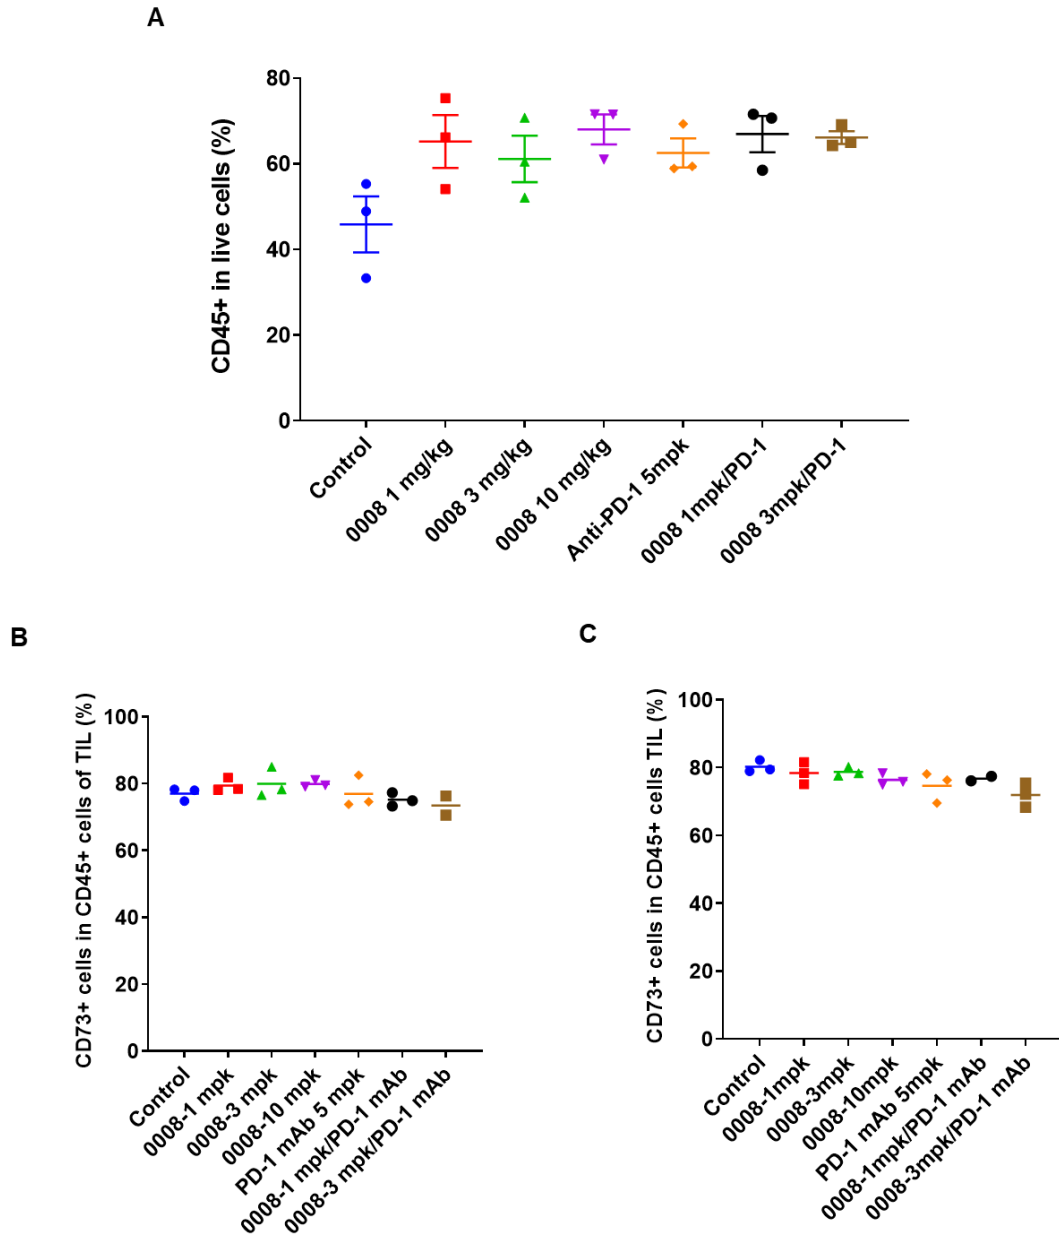

**Figure S4** Tumor infiltrating leukocyte (TIL) in tumor tissues and CD73 expression on TIL. (A) TIL marker CD45 positive cells in tumor tissues collected at 2 hours post dosing of SHR170008 at the end of the study. Data show mean  $\pm$  SEM. (B and C) The expression of CD73 on CD45<sup>+</sup> cells from tumor tissues at 2 hours post dosing (B) and 6 hours post dosing (C). mpk = mg/kg. 0008 = SHR170008.

**A**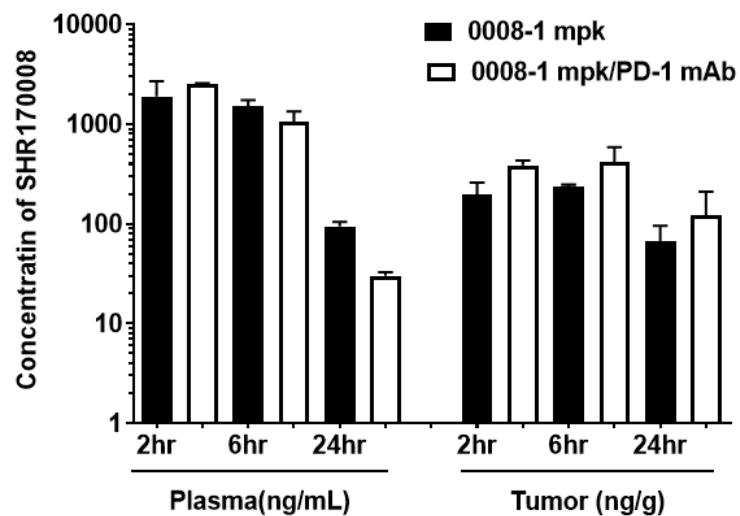**B**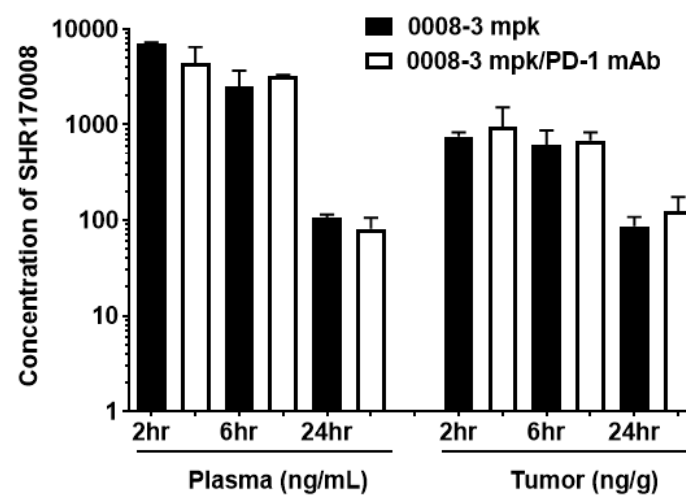

**Figure S5** Exposures of SHR170008 in plasma and tumor tissues from syngeneic EMT6 mouse breast tumor model. (**A** and **B**) Exposures of SHR170008 at 1 mg/kg (**A**) or 3 mg/kg (**B**) as single agent (black bar) and in combination group (open bar) at the end of the study are shown. Symbols indicated mean  $\pm$  SEM. 0008 = SHR170008.

**Table S1** Stability of SHR170008 in rat plasma

| Time (minute) | SHR170008  |                    | Dierliuzuo |                    |
|---------------|------------|--------------------|------------|--------------------|
|               | %Remaining | $t_{1/2}$ (minute) | %Remaining | $t_{1/2}$ (minute) |
| 0             | 100.0      | 154                | 100.0      | 26.0               |
| 30            | 80.6       |                    | 45.7       |                    |
| 60            | 68.7       |                    | 19.3       |                    |
| 90            | 67.3       |                    | 8.07       |                    |
| 120           | 65.7       |                    | 4.26       |                    |
| 240           | 65.8       |                    | 0.17       |                    |

**Table S2** Observed metabolites of SHR170008 in mouse, rat, dog, monkey, and human liver microsomes on LC-ddMS2 scan

| Species | Peak ID   | RT (min) | Metabolic pathway | Mass Shift | Formula Change | Theo. m/z   | Meas. m/z   | ppm | Peak Area |
|---------|-----------|----------|-------------------|------------|----------------|-------------|-------------|-----|-----------|
| Mouse   | SHR170008 | 8.795    | SHR170008         | 0.0000000  | -              | 538.1252888 | 538.1259766 | 1.3 | 362921538 |
| Rat     | SHR170008 | 8.888    | SHR170008         | 0.0000000  | -              | 538.1252888 | 538.1257324 | 0.8 | 390425194 |
| Dog     | SHR170008 | 8.973    | SHR170008         | 0.0000000  | -              | 538.1252888 | 538.1257324 | 0.8 | 405283279 |
| Monkey  | SHR170008 | 9.079    | SHR170008         | 0.0000000  | -              | 538.1252888 | 538.1259155 | 1.2 | 409237283 |
| Human   | SHR170008 | 9.119    | SHR170008         | 0.0000000  | -              | 538.1252888 | 538.1254272 | 0.3 | 430241899 |

**Table S3** Observed metabolites of SHR170008 in mouse and rat plasma on LC- ddMS2 scan

| Species   | Peak ID   | RT (min) | Metabolic pathway | Mass Shift | Formula Change | Theo. m/z   | Meas. m/z   | ppm | Peak Area |
|-----------|-----------|----------|-------------------|------------|----------------|-------------|-------------|-----|-----------|
| Mouse_ig  | SHR170008 | 9.147    | SHR170008         | 0.0000000  | -              | 538.1252888 | 538.1264648 | 2.2 | 4955573   |
| Mouse_iv  | SHR170008 | 8.985    | SHR170008         | 0.0000000  | -              | 538.1252888 | 538.1260986 | 1.5 | 281494070 |
| Rat_ig    | SHR170008 | 9.175    | SHR170008         | 0.0000000  | -              | 538.1252888 | 538.1264038 | 2.1 | 13084565  |
| Rat_iv    | SHR170008 | 8.965    | SHR170008         | 0.0000000  | -              | 538.1252888 | 538.1258545 | 1.1 | 747277169 |
| dog_ig    | SHR170008 | 9.056    | SHR170008         | 0.0000000  | -              | 538.1252888 | 538.1267090 | 2.6 | 3329263   |
| dog_iv    | SHR170008 | 9.037    | SHR170008         | 0.0000000  | -              | 538.1252888 | 538.1263428 | 2.0 | 31159968  |
| Monkey_ig | SHR170008 | 9.172    | SHR170008         | 0.0000000  | -              | 538.1252888 | 538.1262207 | 1.7 | 18803690  |
| Monkey_iv | SHR170008 | 9.158    | SHR170008         | 0.0000000  | -              | 538.1252888 | 538.1259766 | 1.3 | 572366503 |

ig = intragastric administration; iv = intravenous administration.

**Table S4** The screening results of SAFETYscan47 panel with 3  $\mu$ M SHR170008

| Assay Name   | Assay Target | Mode       | % Response  |             |         |
|--------------|--------------|------------|-------------|-------------|---------|
|              |              |            | Replicate 1 | Replicate 2 | Average |
| Calcium Flux | ADORA2A      | Agonist    | 0.0         | 3.9         | 2.0     |
|              |              | Antagonist | 0.0         | 4.7         | 2.3     |
|              | ADRA1A       | Agonist    | 0.0         | 0.3         | 0.1     |
|              |              | Antagonist | 0.0         | 0.0         | 0.0     |
| cAMP         | ADRA2A       | Agonist    | 9.5         | 8.6         | 9.0     |
|              |              | Antagonist | 0.0         | 0.0         | 0.0     |
|              | ADRB1        | Agonist    | 1.3         | 0.0         | 0.6     |
|              |              | Antagonist | 0.0         | 0.3         | 0.1     |
|              | ADRB2        | Agonist    | 0.0         | 0.0         | 0.0     |
|              |              | Antagonist | 0.0         | 11.3        | 5.6     |
| Calcium Flux | AVPR1A       | Agonist    | 1.1         | 0.0         | 0.5     |
|              |              | Antagonist | 0.0         | 0.0         | 0.0     |
|              | CCKAR        | Agonist    | 0.7         | 0.7         | 0.7     |
|              |              | Antagonist | 0.0         | 0.0         | 0.0     |
|              | CHRM1        | Agonist    | 1.7         | 0.0         | 0.9     |

|              |       |            |      |      |     |
|--------------|-------|------------|------|------|-----|
|              |       | Antagonist | 0.0  | 0.0  | 0.0 |
| cAMP         | CHRM2 | Agonist    | 0.0  | 0.0  | 0.0 |
|              |       | Antagonist | 0.0  | 2.4  | 1.2 |
| Calcium Flux | CHRM3 | Agonist    | 0.0  | 0.0  | 0.0 |
|              |       | Antagonist | 0.0  | 0.0  | 0.0 |
| cAMP         | CNR1  | Agonist    | 1.7  | 5.4  | 3.5 |
|              |       | Antagonist | 12.0 | 5.0  | 8.5 |
|              | CNR2  | Agonist    | 3.9  | 11.6 | 7.8 |
|              |       | Antagonist | 0.0  | 9.2  | 4.6 |
|              | DRD1  | Agonist    | 0.0  | 0.0  | 0.0 |
|              |       | Antagonist | 0.0  | 0.0  | 0.0 |
|              | DRD2S | Agonist    | 0.0  | 0.0  | 0.0 |
|              |       | Antagonist | 0.9  | 1.7  | 1.3 |
| Calcium Flux | EDNRA | Agonist    | 0.0  | 0.0  | 0.0 |
|              |       | Antagonist | 0.0  | 0.0  | 0.0 |
|              | HRH1  | Agonist    | 0.0  | 0.0  | 0.0 |
|              |       | Antagonist | 0.0  | 0.0  | 0.0 |
| cAMP         | HRH2  | Agonist    | 0.0  | 0.0  | 0.0 |

|                           |       |            |     |     |     |
|---------------------------|-------|------------|-----|-----|-----|
|                           | HTR1A | Antagonist | 0.0 | 0.0 | 0.0 |
|                           |       | Agonist    | 1.6 | 4.3 | 2.9 |
|                           | HTR1B | Antagonist | 5.3 | 5.3 | 5.3 |
|                           |       | Agonist    | 0.0 | 0.4 | 0.2 |
|                           |       | Antagonist | 8.6 | 2.2 | 5.4 |
| Calcium Flux              | HTR2A | Agonist    | 0.0 | 0.0 | 0.0 |
|                           |       | Antagonist | 0.0 | 0.0 | 0.0 |
|                           | HTR2B | Agonist    | 0.0 | 1.4 | 0.7 |
|                           |       | Antagonist | 0.0 | 0.0 | 0.0 |
| cAMP                      | OPRD1 | Agonist    | 0.0 | 2.4 | 1.2 |
|                           |       | Antagonist | 3.5 | 0.0 | 1.8 |
|                           | OPRK1 | Agonist    | 0.0 | 0.0 | 0.0 |
|                           |       | Antagonist | 0.0 | 1.0 | 0.5 |
|                           | OPRM1 | Agonist    | 0.0 | 0.0 | 0.0 |
|                           |       | Antagonist | 0.8 | 2.4 | 1.6 |
| NHR Nuclear Translocation | AR    | Agonist    | 0.0 | 0.0 | 0.0 |
|                           |       | Antagonist | 0.0 | 4.2 | 2.1 |
| NHR Protein               | GR    | Agonist    | 0.1 | 0.0 | 0.0 |



|             |               |            |     |     |     |
|-------------|---------------|------------|-----|-----|-----|
| Interaction |               | Antagonist | 6.0 | 0.0 | 3.0 |
| Transporter | DAT           | Blocker    | 0.0 | 0.0 | 0.0 |
|             | NET           | Blocker    | 0.0 | 0.0 | 0.0 |
|             | SERT          | Blocker    | 1.3 | 0.0 | 0.7 |
| Ion Channel | CAV1.2        | Blocker    | 0.0 | 2.5 | 1.2 |
|             | GABAA         | Opener     | 0.0 | 0.0 | 0.0 |
|             |               | Blocker    | 0.2 | 0.0 | 0.1 |
|             | hERG          | Blocker    | 0.0 | 0.0 | 0.0 |
|             | HTR3A         | Opener     | 0.0 | 0.0 | 0.0 |
|             |               | Blocker    | 0.0 | 3.4 | 1.7 |
|             | KvLQT1/minK   | Opener     | 0.0 | 0.0 | 0.0 |
|             |               | Blocker    | 6.7 | 3.0 | 4.9 |
|             | nAChR(a4/b2)  | Opener     | 0.0 | 0.0 | 0.0 |
|             |               | Blocker    | 0.0 | 0.0 | 0.0 |
|             | NAV1.5        | Blocker    | 1.5 | 0.0 | 0.7 |
|             | NMDAR (1A/2B) | Opener     | 0.0 | 0.0 | 0.0 |
|             |               | Blocker    | 0.0 | 0.0 | 0.0 |
| Non-Kinase  | AChE          | Inhibitor  | 0.7 | 6.6 | 3.7 |

|                |        |           |      |      |      |
|----------------|--------|-----------|------|------|------|
| Enzymatic      | COX1   | Inhibitor | 2.4  | 0.9  | 1.7  |
|                | COX2   | Inhibitor | 10.5 | 2.3  | 6.4  |
|                | MAOA   | Inhibitor | 13.2 | 9.5  | 11.4 |
|                | PDE3A  | Inhibitor | 1.6  | 1.3  | 1.4  |
|                | PDE4D2 | Inhibitor | 6.2  | 14.5 | 10.3 |
| Kinase Binding | INSR   | Inhibitor | 18.5 | 16.8 | 17.7 |
|                | LCK    | Inhibitor | 8.4  | 3.3  | 5.8  |
|                | ROCK1  | Inhibitor | 3.3  | 11.1 | 7.2  |
|                | VEGFR2 | Inhibitor | 15.2 | 0.0  | 7.6  |

## Supplementary Methods

Characterization of SHR170008 by analyses of  $^1\text{H}$  NMR,  $^{13}\text{C}$  NMR, HRMS and HPLC

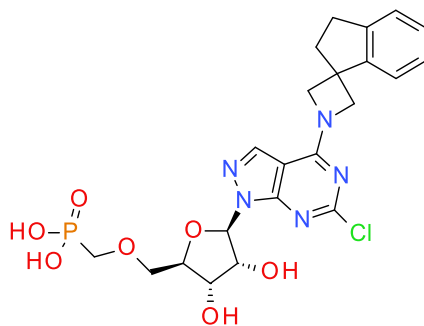

SHR170008

Proton nuclear magnetic resonance ( $^1\text{H}$  NMR) spectra were recorded on a Bruker AVANCE II 400 MHz spectrometer. Carbon nuclear magnetic resonance ( $^{13}\text{C}$  NMR) spectra were recorded on a Bruker AVANCE NEO 500 MHz spectrometer. All chemical shifts are reported in parts per million ( $\delta$ ) relative to an internal standard tetramethylsilane. The following abbreviations are used to denote signal patterns: s = singlet, d = doublet, t = triplet, m = multiplet, and br = broad. The elemental composition was derived from the mass spectra acquired at the high resolution of about 140,000 on a Thermo Q Exactive mass spectrometer (Thermo Scientific). The high mass accuracy below 3 ppm was obtained by using a lock mass.

The purity of intermedia and SHR170008 were assessed by analytical HPLC. Purity data were collected by a HPLC with Waters e2695-2489 (uv/visible detector). The column was a Waters SunFire C18 (3.5  $\mu\text{m}$  particle size, I.D.  $\times$  L

4.6 mm × 75 mm, Waters, America) with a temperature of 30°C and a flow rate of 1.0 mL/min. Mobile phases A and B under an acidic condition were a mixture of 0.1% trifluoroacetic acid in H<sub>2</sub>O and 0.1% trifluoroacetic acid in CH<sub>3</sub>CN, respectively. The ratio of mobile phase B was increased linearly from 5% to 95% over 30 minutes.

<sup>1</sup>H NMR (500 MHz, Methanol-*d*<sub>4</sub>) δ (ppm) 8.05 (s, 1H), 7.58 – 7.47 (m, 1H), 7.35 – 7.21 (m, 3H), 6.24 (d, *J* = 4.0 Hz, 1H), 4.73 – 4.57 (m, 3H), 4.52 – 4.40 (m, 3H), 4.22 – 4.16 (m, 1H), 3.84 (dd, *J* = 10.9, 3.7 Hz, 1H), 3.76 – 3.72 (m, 3H), 2.99 (t, *J* = 7.0 Hz, 2H), 2.60 – 2.48 (m, 2H).

<sup>13</sup>C NMR (126 MHz, Methanol-*d*<sub>4</sub>) δ (ppm) 159.56, 158.03, 156.47, 147.10, 144.74, 135.15, 128.90, 128.33, 125.52, 123.51, 123.29, 100.41, 90.12, 84.38, 75.12, 72.73, 68.30, 67.01, 65.27, 64.19, 39.74, 31.23.

HRMS: calculated for C<sub>22</sub>H<sub>25</sub>ClN<sub>5</sub>O<sub>7</sub>P (M+H)<sup>+</sup> 538.1258, found 538.1260.

HPLC purity: 99.55%.

#### SAFETYscan *In Vitro* Pharmacological Profiling

SAFETYscan testing was carried out by DiscoverX (San Diego, CA).

SHR170008 was screened at 3 μM in duplicates.

Analysis of rat plasma stability:

Rat plasma and SHR170008 or control compound (Dierliuzuo) was mixed in individual wells of a 96-well plate. The final concentration of the compound was 1  $\mu\text{M}$  (0.06% DMSO) in rat plasma. The plate was incubated at 37°C in water bath with gentle agitation. During the incubation, aliquots were withdrawn at the time point indicated (0, 15, 30, 60, 90, 120, and 240 minutes, respectively). At timing start (0 minutes), internal standard glacial acetonitrile was added. At other time points, ACN solution containing internal standard was used to quench the reaction. After mixing, the quenched aliquots were centrifuged, and supernatant was withdrawn for analysis by LC-MS/MS. The slope of the  $\ln$  (%remaining) versus time point line was used to calculate  $t_{1/2}$  according to the following formula:

$$\text{Half lie } (t_{1/2}) = - \frac{\ln 2}{\text{Slope}}$$

#### Identification and Profiling of Metabolites

Liver microsomes of CD-1 mouse (8178001), Sprague-Dawley rat (8283002), Beagle dog (6116002), Cynomolgus monkey (0041001CNC) and human (0349001) were purchased from Corning Gentest. Microsomal incubation was carried out with liver microsomes of indicated (0.5 mg protein/mL), 10  $\mu\text{M}$  SHR170008, 1 mM Nicotinamide adenine dinucleotide phosphate (NADPH, Acros Organics, A0354537) and 3 mM  $\text{MgCl}_2$  (Sigma-Aldrich, M8266) in a total volume of 400  $\mu\text{L}$ . The mixture was pre-incubated at 37°C for 5 minutes and then NADPH was added to start the reaction. After incubation for 1 hour at 37°C, an aliquot of 0.8 mL of acetonitrile was added to terminate the reaction and the mixtures were

then centrifuged at  $20,879 \times g$  for 10 minutes. The resulting supernatants were dried in vacuum. The residues were reconstituted with 200  $\mu\text{L}$  of water-acetonitrile solution (v/v, 3:1) and centrifuged. 5  $\mu\text{L}$  of the supernatant was submitted to UPLC-QE-HRMS for metabolite identification and profiling.

To identify the metabolites presented *in vivo*, the plasma of mouse and rat were collected and pooled, respectively, according to the AUC rule described by Cornelis Hop *et al* [1]. The plasma samples were mixed with 4-fold volume of acetonitrile. The mixtures were then centrifuged at  $20,879 \times g$  for 10 minutes and the supernatants were dried in vacuum. The residue of each sample was reconstituted, and the supernatant was submitted to UPLC-QE-HRMS for metabolite identification and profiling as described above. The housing conditions and in-life procedures were approved by the Institutional Animal Care and Use Committees (IACUC). The experiments were carried out in accordance with the Guiding Principles for the Care and Use of Laboratory Animals and complied with the ARRIVE guidelines.

#### References:

1. Hop CECA, Wang Z, Chen Q, Kwei G. Plasm-pooling methods to increase throughput for *in vivo* pharmacokinetic screening. *J Pharm Sci.* 1998;87, 901-903. doi: 10.1021/js970486q
